# Supplementary material for: Label-free biosensor assay decodes the dynamics of Toll-like receptor signaling
Source: Springer Nature journal article supplement (doi:10.1038/s41467-024-53770-9), 2024-11-12
Supplement: MOESM1 [file 41467_2024_53770_MOESM1_ESM.pdf]

# Supplementary Information

**Label-free biosensor assay decodes the dynamics of Toll-like receptor signaling**

**Janine Holze<sup>1</sup>, Felicitas Lauber<sup>1</sup>, Sofia Soler<sup>2</sup>, Evi Kostenis<sup>3</sup>, Günther Weindl<sup>1,\*</sup>**

<sup>1</sup>Pharmaceutical Institute, Section Pharmacology and Toxicology, University of Bonn, Bonn, Germany

<sup>2</sup>Institute of Experimental Haematology and Transfusion Medicine, University Hospital Bonn, Bonn, Germany.

<sup>3</sup>Institute for Pharmaceutical Biology, Molecular, Cellular and Pharmacobiology Section, University of Bonn, Bonn, Germany

\*e-mail: guenther.weindl@uni-bonn.de

This PDF file includes:

Supplementary Figures 1 to 16

Uncropped images of Western blots in Supplementary Figure 16

Supplemental References

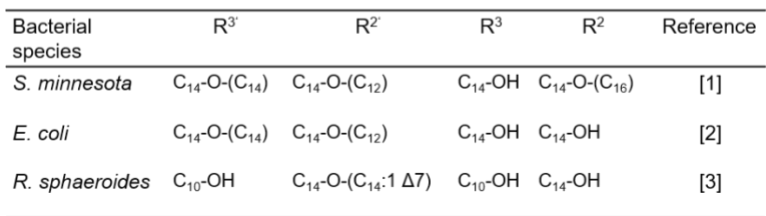

2

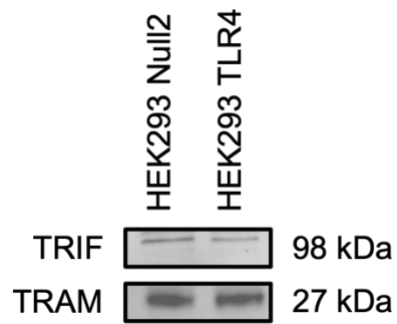

**Supplementary Figure 2. HEK293 cells express adaptor proteins TRIF and TRAM.** Western blot analysis of the expression levels of TRIF and TRAM in control HEK293 cells (HEK293 Null2) and HEK293 TLR4/MD-2/CD14 cells (HEK293 TLR4). Data are representative of three biologically independent experiments. Uncropped versions of blots are provided in Supplementary Fig. 16.

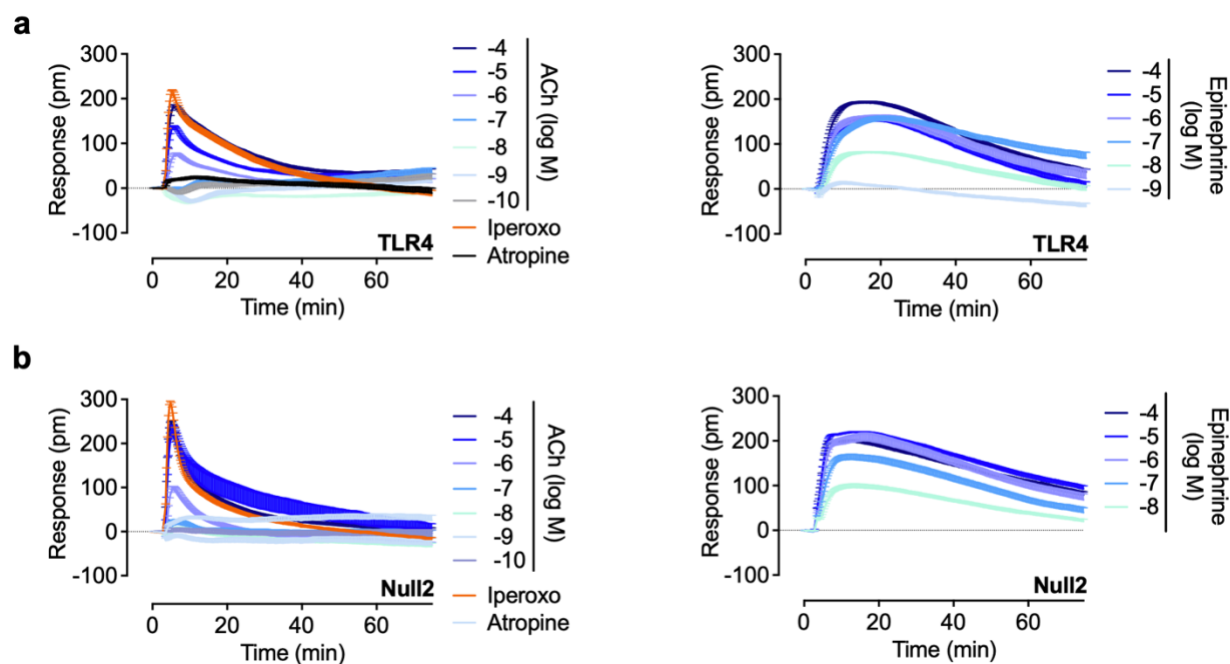

**Supplementary Figure 3. Optical biosensor shows consistent GPCR signaling patterns in HEK293 cells.** **a, b** HEK293 TLR4/MD-2/CD14 reporter cells (**a**) or control HEK293 cells (Null2) (**b**) stimulated with the indicated concentrations of acetylcholine (ACh) and epinephrine, iperoxo (100  $\mu$ M), and atropine (10  $\mu$ M). ACh visualizes signaling along the  $G_{q\alpha/11}$  pathway whereas epinephrine induces presumably the  $G_s$  pathway. Baseline-corrected DMR recordings are mean + SEM and representative of three biologically independent experiments. Source data are provided as a Source Data file.

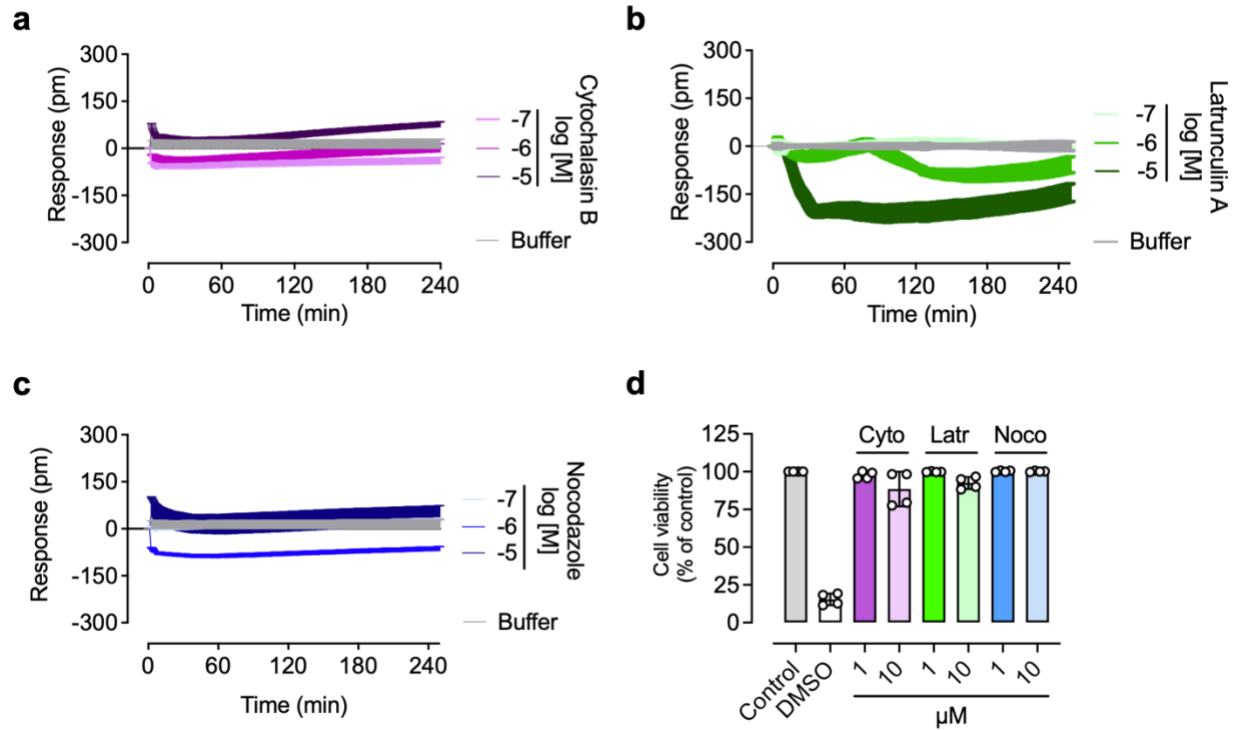

**Supplementary Figure 4. Actin and tubulin inhibitors do not affect cell viability.** a-c HEK293 TLR4/MD-2/CD14 reporter cells were stimulated with the indicated concentrations (log M) of the actin inhibitors cytochalasin B (a) and latrunculin A (b), as well as the tubulin inhibitor nocodazole (c). Baseline-corrected DMR recordings are mean + SEM and representative of three biologically independent experiments. d HEK293 TLR4/MD-2/CD14 cells were incubated with the actin and tubulin inhibitors for 4 h. Cell viability was determined by MTT assay and normalized to non-stimulated cells. DMSO (30%, v/v) served as control. Values presented are mean  $\pm$  SEM ( $n = 4$  biologically independent experiments). Source data are provided as a Source Data file.

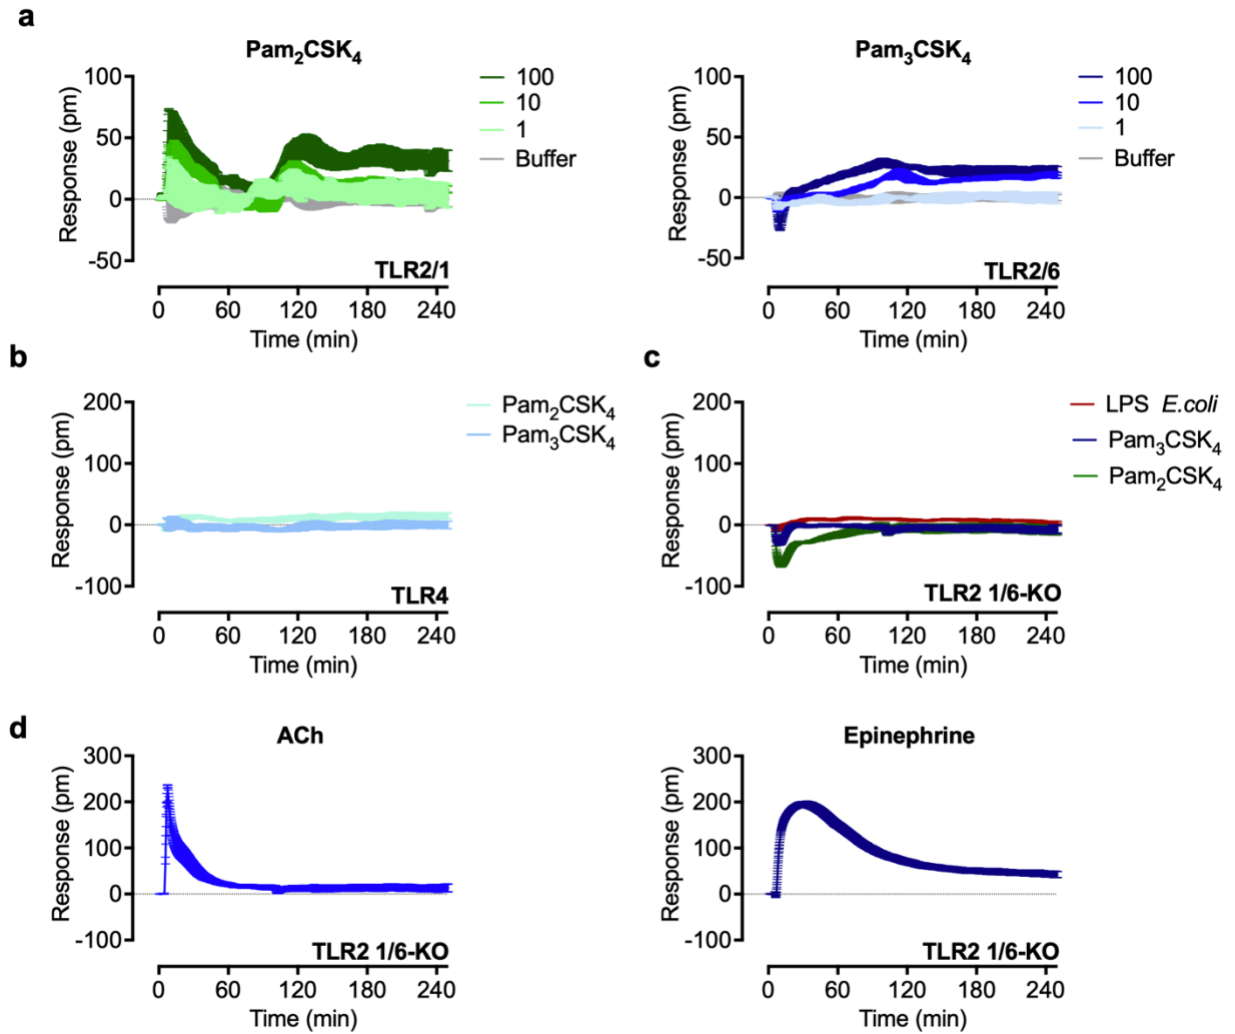

**Supplementary Figure 5. DMR responses induced by Pam<sub>3</sub>CSK<sub>4</sub> and Pam<sub>2</sub>CSK<sub>4</sub> in HEK293 cells.**

**a** HEK293 TLR2/1 or 2/6 reporter cells stimulated with the indicated concentrations (ng/ml) of the TLR2 agonists Pam<sub>2</sub>CSK<sub>4</sub> and Pam<sub>3</sub>CSK<sub>4</sub>. **b** HEK293 TLR4/MD-2/CD14 reporter cells stimulated with the TLR2 agonists Pam<sub>2</sub>CSK<sub>4</sub> (100 ng/ml) and Pam<sub>3</sub>CSK<sub>4</sub> (100 ng/ml). **c, d** HEK293 TLR2 1/6-KO cells stimulated with the TLR4 agonist LPS *E.coli* (10 ng/ml), TLR2/1 agonist Pam<sub>3</sub>CSK<sub>4</sub> (100 ng/ml), TLR2/6 agonist Pam<sub>2</sub>CSK<sub>4</sub> (100 ng/ml) (**c**), acetylcholine (100 μM) or epinephrine (100 μM) (**d**). Baseline-corrected DMR recordings are mean + SEM and representative of three biologically independent experiments. Source data are provided as a Source Data file.

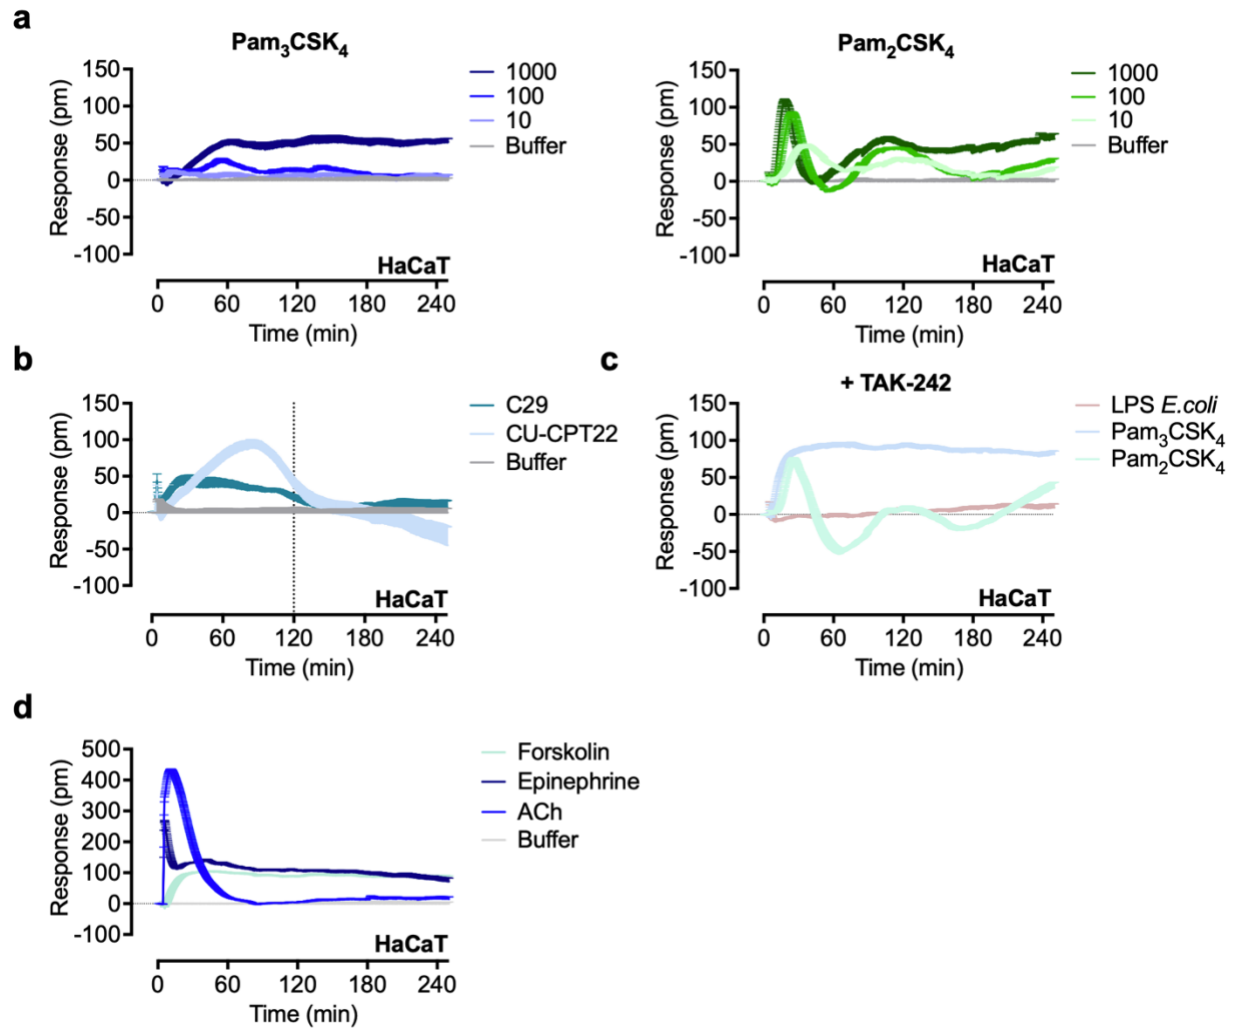

**Supplementary Figure 6. Optical biosensor assay in HaCaT cells.** **a** HaCaT cells stimulated with the indicated concentrations (ng/ml) of TLR2/6 agonist Pam<sub>2</sub>CSK<sub>4</sub> or TLR2/1 agonist Pam<sub>3</sub>CSK<sub>4</sub>. **b** HaCaT cells incubated with the TLR2 antagonists CU-CPT22 (50 μM) and C29 (50 μM). The dashed line indicates the preincubation time (120 min) of the TLR2 antagonists. **c** HaCaT cells stimulated with the TLR4 agonist LPS *E. coli* (100 ng/ml), TLR2/1 agonist Pam<sub>3</sub>CSK<sub>4</sub> (100 ng/ml) or TLR2/6 agonist Pam<sub>2</sub>CSK<sub>4</sub> (100 ng/ml) preincubated with the TLR4 inhibitor TAK-242 (50 μM). **d** HaCaT cells stimulated with ACh (100 μM), epinephrine (100 μM) and forskolin (10 μM). Baseline-corrected DMR recordings are mean + SEM and representative of three biologically independent experiments. Source data are provided as a Source Data file.

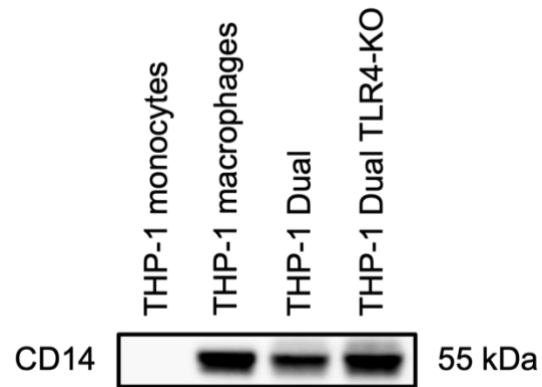

**Supplementary Figure 7. THP-1 monocytes express no CD14.** Western blot analysis of CD14 expression levels in THP-1 monocytes, PMA-differentiated THP-1 macrophages, THP-1 TLR4/MD-2/CD14 (THP-1 Dual) and THP-1 Dual KO-TLR4/MD-2/CD14 (THP-1 Dual TLR4-KO) cells. Data are representative of three biologically independent experiments. Uncropped version of blot is provided in Supplementary Fig. 16.



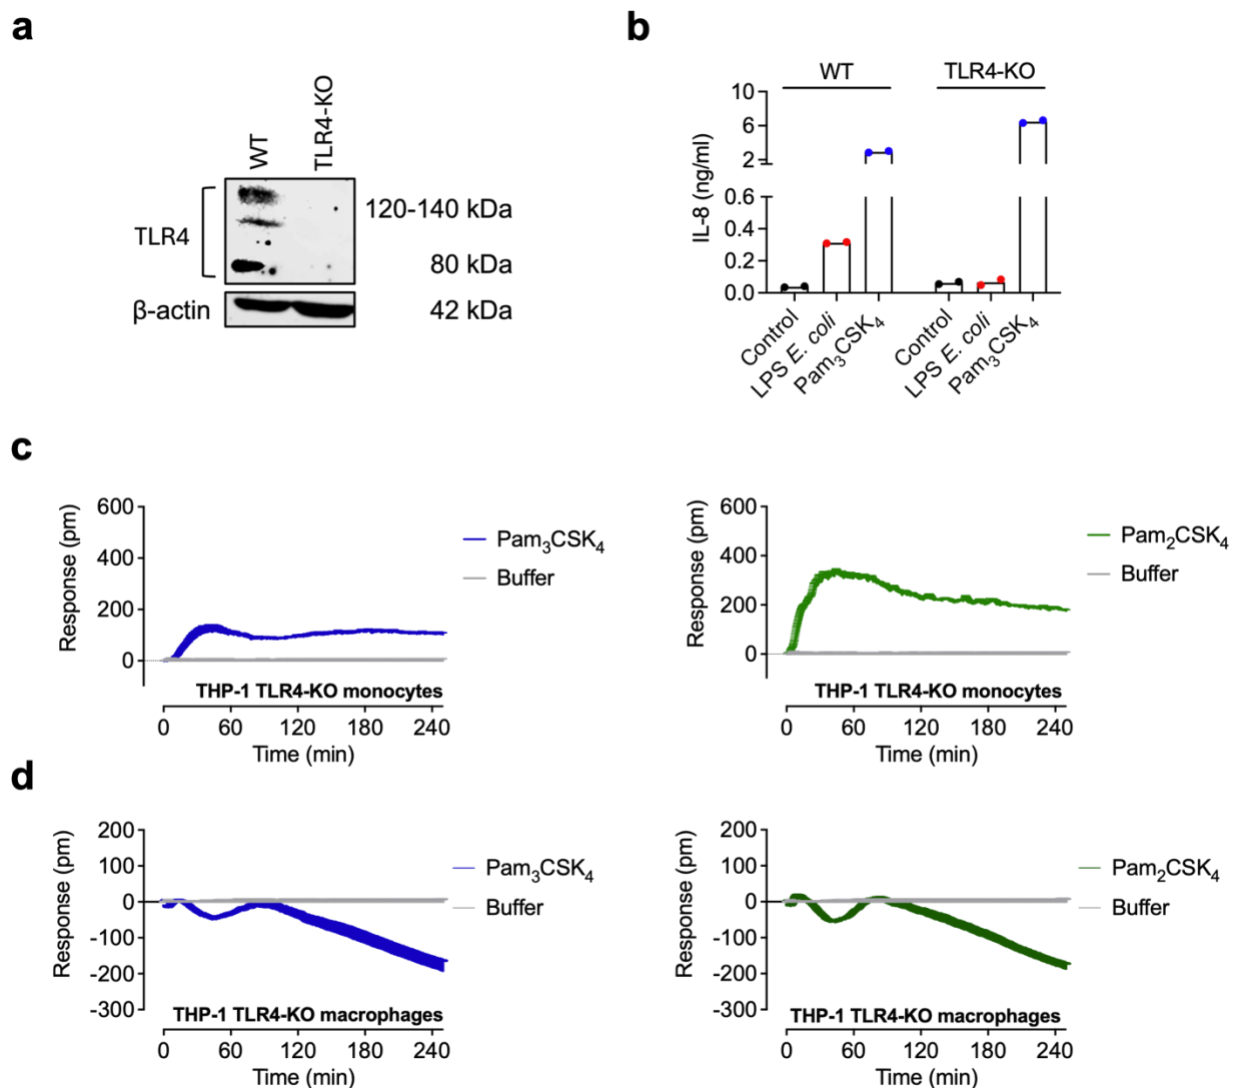

### Supplementary Figure 8. THP-1 TLR4-KO cells do not respond to LPS but TLR2 ligands. **a**

Western blot analysis of TLR4 expression in THP-1 WT and TLR4-KO cells. β-actin served as an internal control. Data are representative of two biologically independent experiments.

Uncropped version of blot is provided in Supplementary Fig. 16. **b** THP-1 WT or TLR4-KO macrophages were stimulated with LPS *E. coli* (1 μg/ml) or Pam<sub>3</sub>CSK<sub>4</sub> (500 ng/ml) overnight. IL-8 release into the cell-free supernatants was determined by ELISA (*n* = 2 biological replicates). **c, d** THP-1 TLR4-KO monocytes (**c**) or macrophages (**d**) were stimulated with Pam<sub>3</sub>CSK<sub>4</sub> (1000 ng/ml) and Pam<sub>2</sub>CSK<sub>4</sub> (1000 ng/ml). Baseline-corrected DMR recordings are mean + SEM and representative of three biologically independent experiments. Source data are provided as a Source Data file.

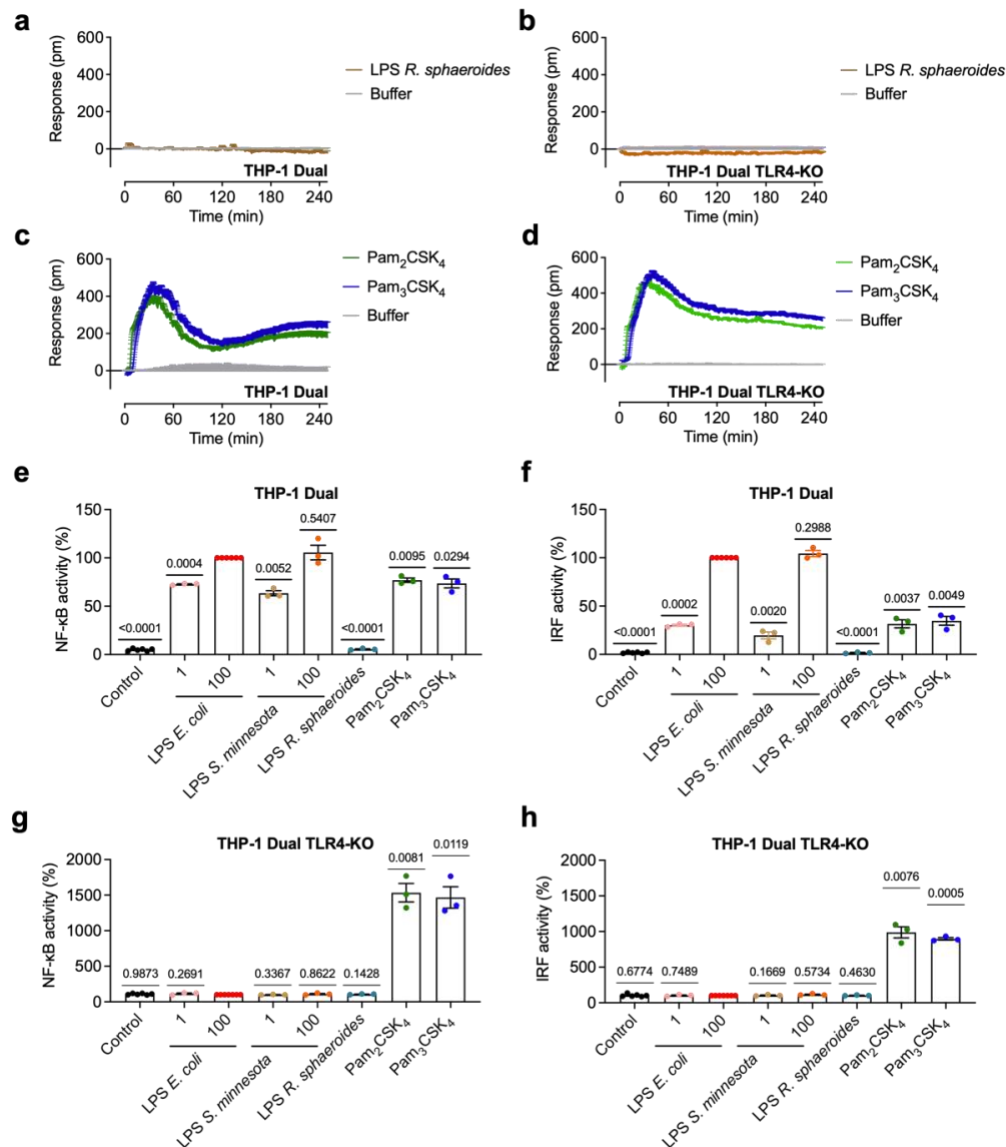

**Supplementary Figure 9. THP-1 Dual TLR4-KO cells do not respond to LPS but TLR2 ligands.** **a-d** THP-1 TLR4/MD-2/CD14 (THP-1 Dual) (**a, c**) or THP-1 Dual KO-TLR4/MD-2/CD14 (THP-1 Dual TLR4-KO) (**b, d**) cells were stimulated with LPS *R. sphaeroides* (1000 ng/ml) (**a, b**), Pam<sub>3</sub>CSK<sub>4</sub> (1000 ng/ml) or Pam<sub>2</sub>CSK<sub>4</sub> (1000 ng/ml) (**c, d**). Baseline-corrected DMR recordings are mean + SEM and representative of three biologically independent experiments. **e-h** THP-1 TLR4/MD-2/CD14 (THP-1 Dual) (**e, f**) or THP-1 Dual KO-TLR4/MD-2/CD14 (THP-1 Dual TLR4-KO) cells (**g, h**) were incubated for 24 h with LPS *E. coli* (1 and 100 ng/ml), LPS *S. minnesota* (1 and 100 ng/ml), or LPS *R. sphaeroides* (100 ng/ml). The TLR2 agonists Pam<sub>3</sub>CSK<sub>4</sub> (1000 ng/ml) and Pam<sub>2</sub>CSK<sub>4</sub> (1000 ng/ml) served as controls. After overnight incubation, activation of NF-κB was assessed by measuring the activity of SEAP in the supernatant using Quanti-Blue (**e, g**) or the IRF response (**f, h**) was assessed by measuring the activity of lucia luciferase in the supernatant using QUANTI-Luc. Data are normalized to LPS *E. coli* (100 ng/ml) and shown as mean ± SEM ( $n = 3$  biological replicates except control and LPS *E. coli* 100 ng/ml,  $n = 6$ ). One-sample  $t$  test against 100% (**e-h**). Source data are provided as a Source Data file.

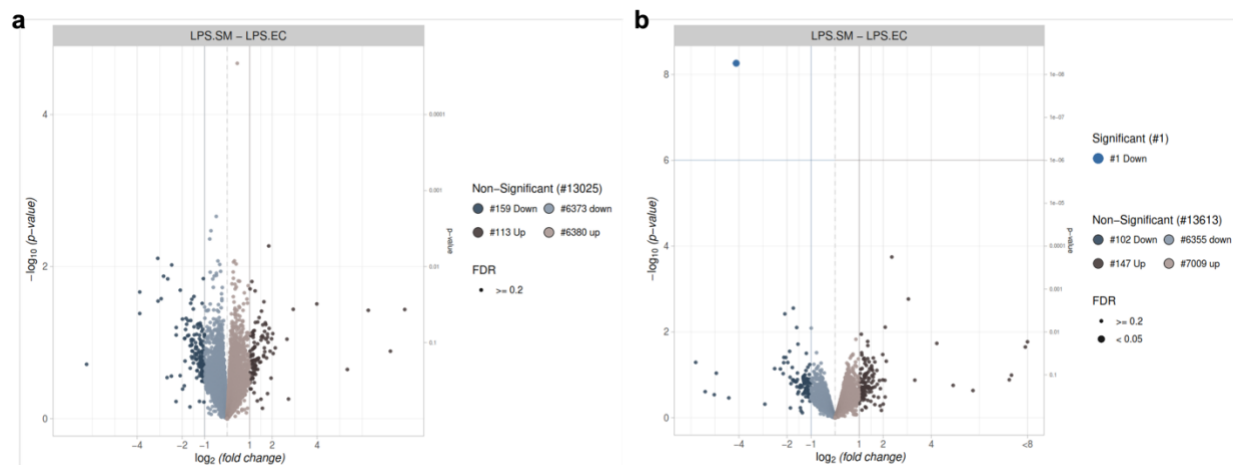

**Supplementary Figure 10. Volcano plots show differential expression of LPS-induced genes in HEK293 TLR4/MD-2/CD14 cells and THP-1 macrophages. a, b** The volcano plots of LPS *S. minnesota* vs. LPS *E. coli* in HEK293 TLR4/MD-2/CD14 cells (a) or THP-1 macrophages (b). For visualization, the package ggplot2 was used.

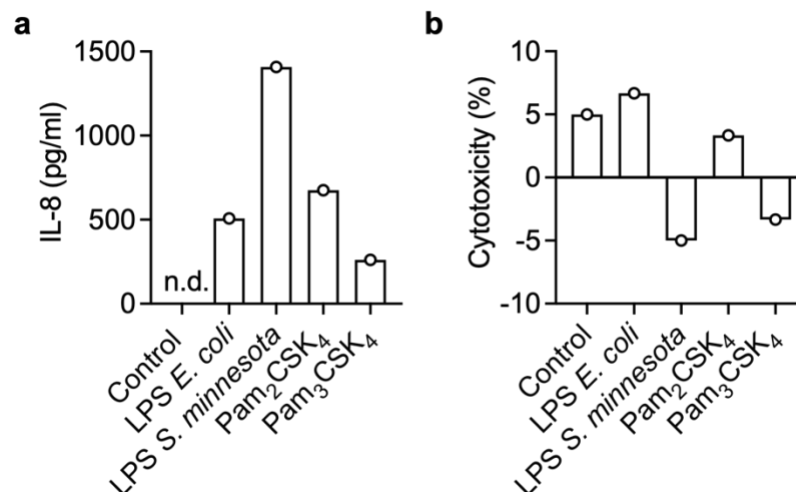

**Supplementary Figure 11. TLR4 and TLR2 ligands trigger IL-8 release in primary monocytes.**

**a, b** IL-8 secretion from primary monocytes (**a**) or cytotoxicity effect (**b**) following stimulation of the cells with LPS *E. coli* (10 ng/ml), LPS *S. minnesota* (10 ng/ml), Pam<sub>2</sub>CSK<sub>4</sub> (1 µg/ml) or Pam<sub>3</sub>CSK<sub>4</sub> (1 µg/ml) for 4 h. Cell-free supernatants were analyzed for IL-8 concentration by ELISA (**a**) and LDH release (**b**). Results are expressed as % of maximal LDH release. Representative results of one donor are shown. Source data are provided as a Source Data file.

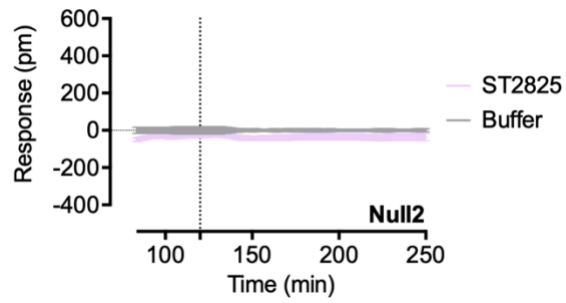

**Supplementary Figure 12. MyD88 inhibitor ST2825 shows no DMR signals in HEK293 cells.**

HEK293 control cells lacking TLR4 (Null2) incubated with the MyD88 inhibitor ST2825 (10  $\mu$ M). The dashed line indicates the preincubation time (120 min) of the inhibitor. Baseline-corrected DMR recordings are mean + SEM and representative of three biologically independent experiments. Source data are provided as a Source Data file.

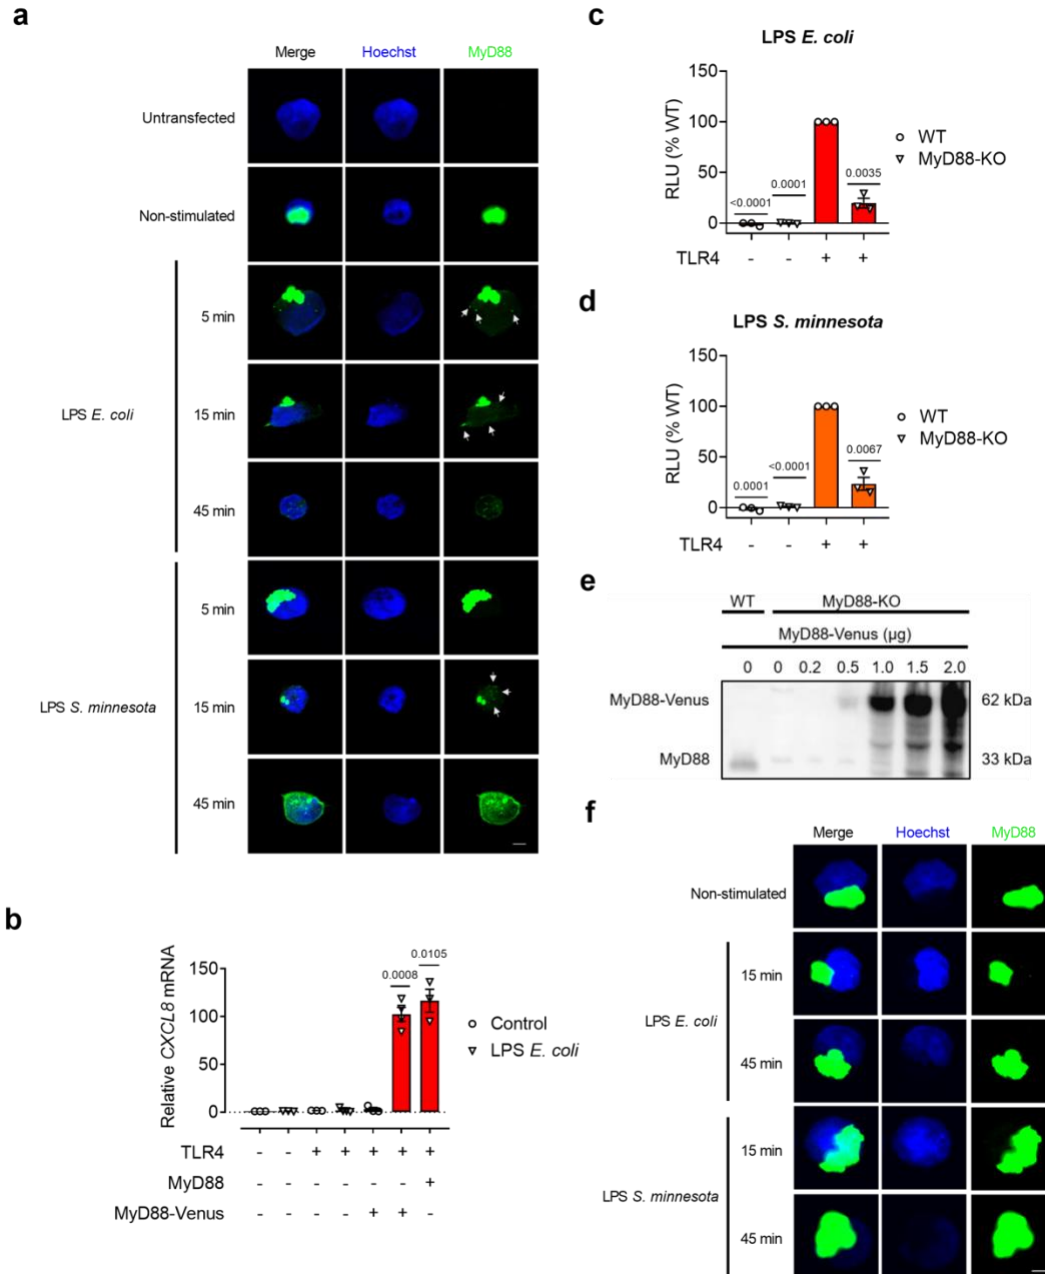

**Supplementary Figure 13. MyD88 localization and functional analysis in HEK293 cells after LPS stimulation.** **a** Immunofluorescence microscopy for localization experiments of MyD88 (green) in transfected HEK293 TLR4/MD-2/CD14 cells before and after stimulation with LPS *E. coli* and LPS *S. minnesota* (100 ng/ml) for 5 min, 15 min or 45 min. Cells are transfected with 200 ng MyD88-Venus construct and counterstained with the nuclear probe Hoechst (blue). Scale bar, 5  $\mu$ m. Images are representative of three biologically independent experiments. **b** Total RNA was extracted from HEK293 MyD88-KO cells after stimulation for 4 h with LPS *E. coli* (100 ng/ml). *CXCL8* mRNA was measured by qRT-PCR and normalized to the expression of the housekeeping gene *GAPDH*. Data are mean  $\pm$  SEM.  $n = 3$  biologically independent experiments except for LPS *E. coli* + TLR4 and LPS *E. coli* + TLR4 + MyD88-Venus,  $n = 4$ ). One-sample  $t$  test against 1. **c, d**

HEK293 WT or HEK293 MyD88-KO cells were transiently transfected with reporter constructs for ELAM luciferase, Renilla luciferase, MD-2, CD14 and with or without wild-type hTLR4. Cells were stimulated for 6 h with LPS *E. coli* (100 ng/ml) (**c**) or LPS *S. minnesota* (100 ng/ml) (**d**). Luciferase activity is expressed as percent of cells transfected with wild-type hTLR4 and stimulated with corresponding LPS concentrations (control, 100% activity). RLU, relative luciferase unit. Data are mean  $\pm$  SEM ( $n = 3$  biological replicates). One-sample  $t$  test against 100%. **e** Western blot analysis of the endogenous expression levels of MyD88 in HEK293 cells as well as MyD88-Venus after transfection in HEK293 MyD88-KO cells. Data are representative of three biologically independent experiments. Uncropped version of blot is provided in Supplementary Fig. 16. **f** Immunofluorescence microscopy for localization experiments of MyD88 (green) in transfected HEK293 MyD88-KO cells without TLR4 before and after stimulation with LPS *E. coli* and LPS *S. minnesota* (100 ng/ml) for 15 min or 45 min. Cells are transfected with 500 ng MyD88-Venus construct and counterstained with the nuclear probe Hoechst (blue). Scale bar, 5  $\mu$ m. Images are representative of three biologically independent experiments. Source data are provided as a Source Data file.

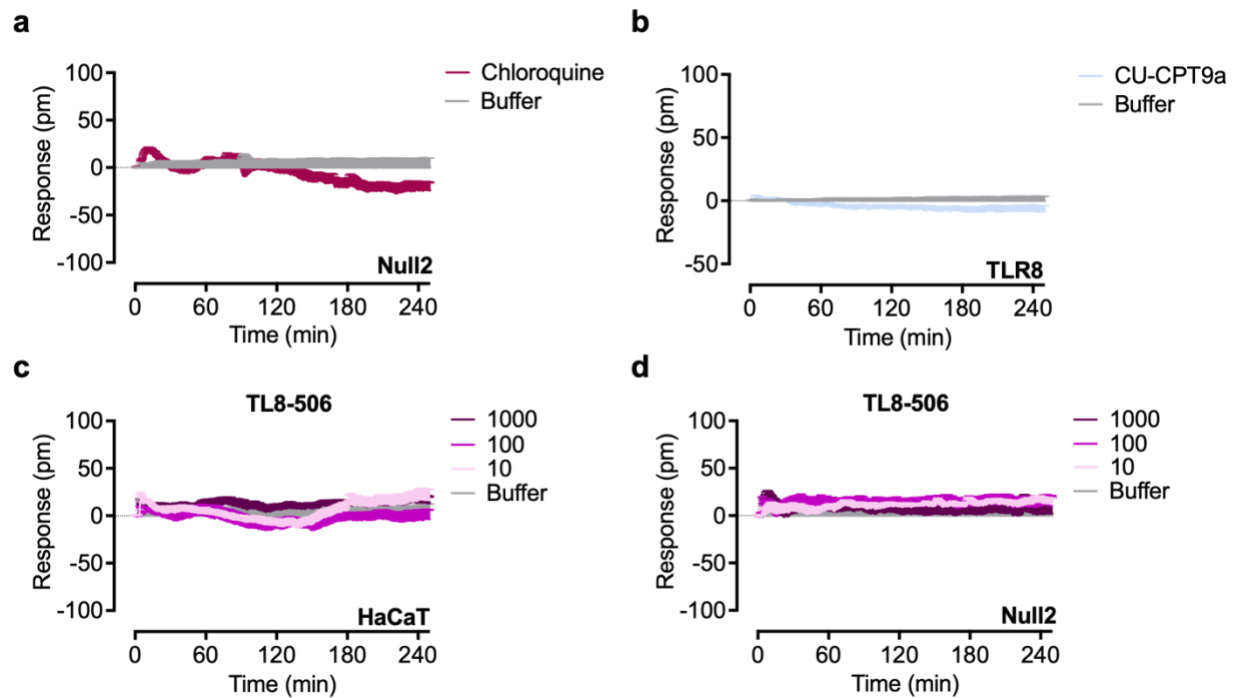

**Supplementary Figure 14. Optical biosensor assay shows no DMR signals in control cells in the presence of TLR3 or TLR8 ligands.** **a** Control HEK293 cells stimulated with chloroquine (15  $\mu$ M). **b** HEK293 TLR8 reporter cells stimulated with the TLR8 inhibitor CU-CPT9a (1  $\mu$ M). **c, d** HaCaT (**c**) and control HEK293 cells (Null2) (**d**) stimulated with the indicated concentrations (ng/ml) of the TLR8 agonist TL8-506. Baseline-corrected DMR recordings are mean + SEM and representative of three biologically independent experiments. Source data are provided as a Source Data file.



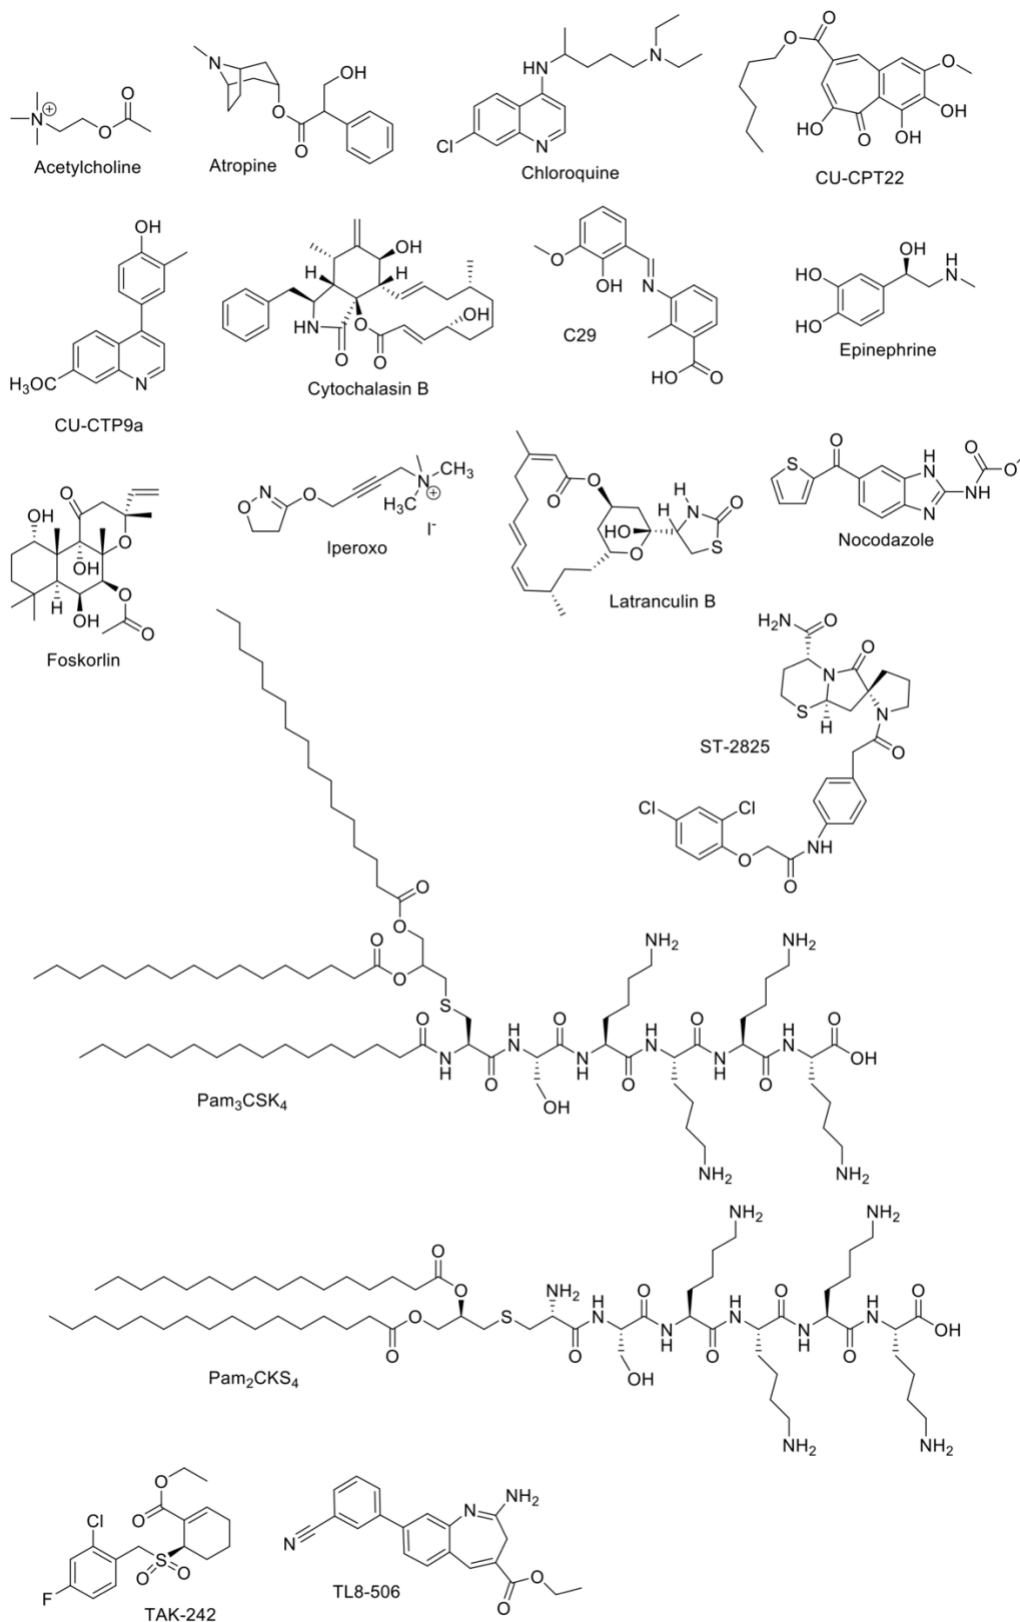

**Supplementary Figure 15. Chemical structures of ligands and inhibitors.**

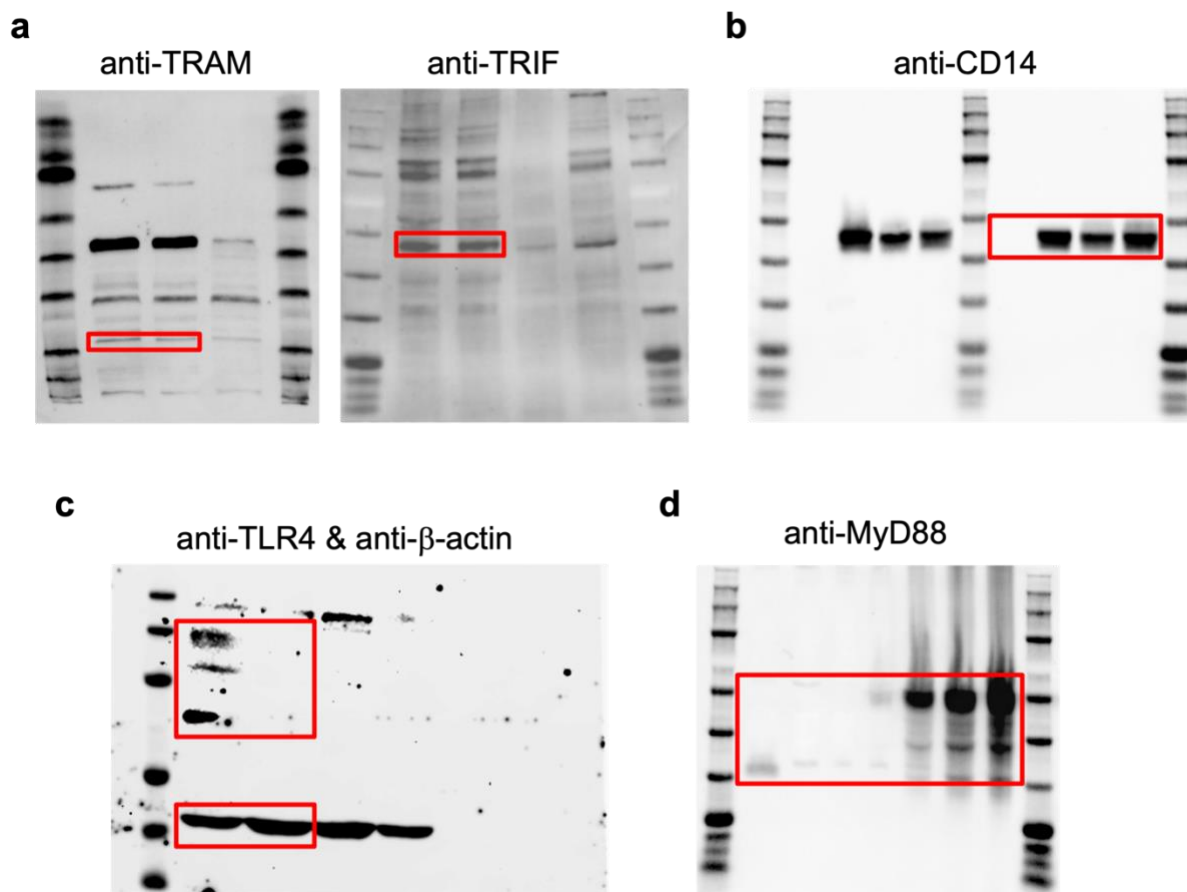

**Supplementary Figure 16. Whole uncropped images of the original western blots.** **a** Complete western blots of TRAM and TRIF shown in Supplemental Fig. 2. **b** Complete western blot of CD14 shown in Supplemental Fig. 7. **c** Complete western blot of TLR4 and  $\beta$ -actin shown in Supplemental Fig. 8a. **d** Complete western blot of MyD88 shown in Supplemental Fig. 13.

### Supplementary References

1. Sforza, S. *et al.* Determination of fatty acid positions in native lipid A by positive and negative electrospray ionization mass spectrometry. *J. Mass Spectrom.* **39**, 378–383; 10.1002/jms.598 (2004).
2. Qureshi, N., Mascagni, P., Ribi, E. & Takayama, K. Monophosphoryl lipid A obtained from lipopolysaccharides of *Salmonella minnesota* R595. Purification of the dimethyl derivative by high performance liquid chromatography and complete structural determination. *J. Bio. Chem.* **260**, 5271–5278 (1985).
3. Irvine, K. L. *et al.* Identification of key residues that confer *Rhodobacter sphaeroides* LPS activity at horse TLR4/MD-2. *PloS one* **9**, e98776; 10.1371/journal.pone.0098776 (2014).
4. Alexander, C. & Rietschel, E. T. Bacterial lipopolysaccharides and innate immunity. *J. Endotoxin Res.* **7**, 167–202 (2001).
